# Supplementary material
Source: publisher figshare collection journal article supplement (https://geolsoc.figshare.com/ndownloader/files/31531080)

**Supplementary information:** Davies et al. *The largest arthropod in Earth history: insights from newly discovered Arthropleura remains (Serpukhovian Stainmore Formation, Northumberland, England)*

Images of 3D mesh model of *Arthropleura*, purchased from turbosquid.com and showing shape for which volume was calculated in Blender (see Garwood and Dunlop, 2014), from different angles. Note the Z axis is exaggerated from 20 cm in order to account for extension of model antennae above dorsal surface.


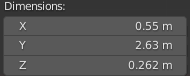


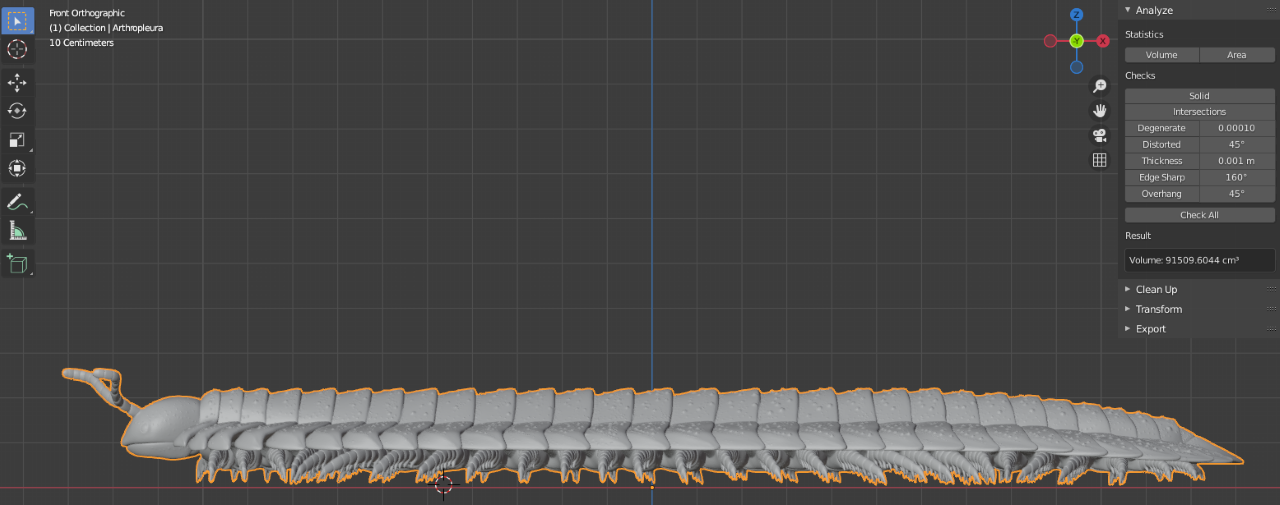


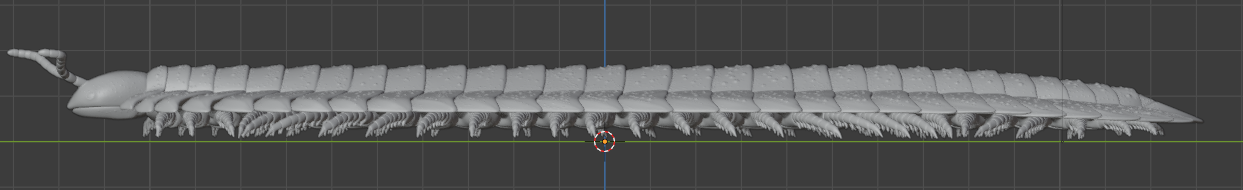


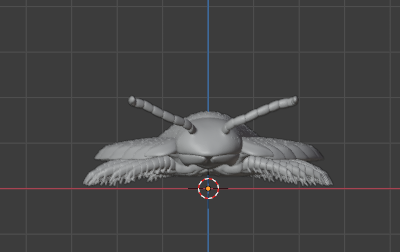


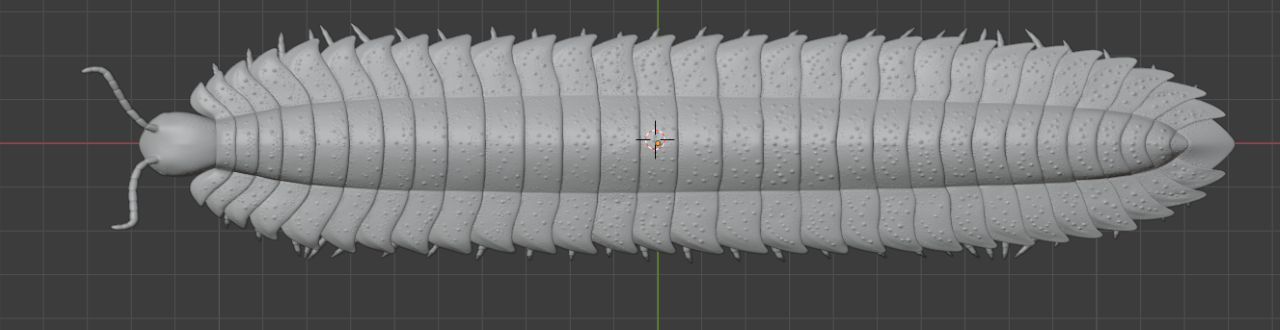


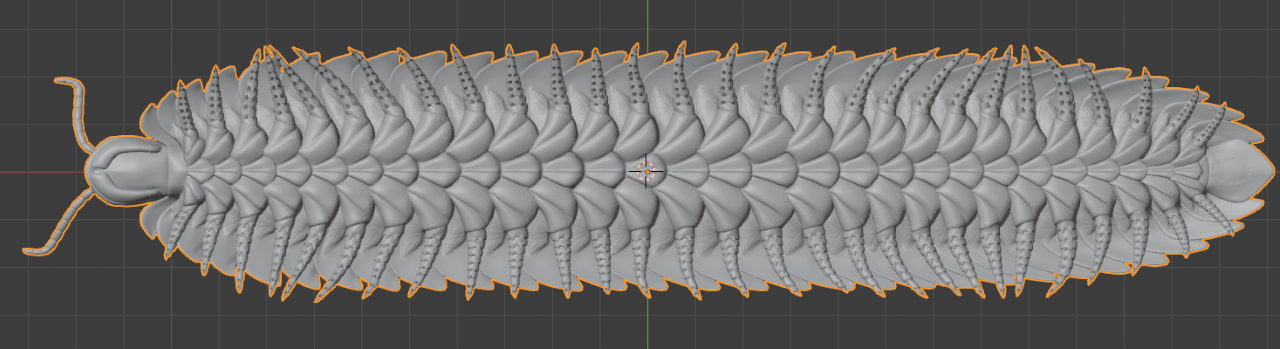

Supplement: Supplementary file 1 [file 31531080]
